# Supplementary material
Source: HighWire-hosted journal article supplement (https://www.highwirestage.com/highwire/filestream/52448/field_highwire_adjunct_files/0/3355_table.pdf)
Supplement: 3355_table.pdf [file 3355_table.pdf]

**On-line Table: Individual comments on BONJ extent in all patients as quantified by the different imaging modalities and examinations**

| Patient No. | Comment                                                                                                                                                                                                                                                                                                                                            |
|-------------|----------------------------------------------------------------------------------------------------------------------------------------------------------------------------------------------------------------------------------------------------------------------------------------------------------------------------------------------------|
| 1           | BONJ preoperatively identified superficially in regions 23–28 of left maxilla; comparable extent of BONJ assessed by different modalities; however, effect and destruction of floor of left maxillary sinus markedly shown by PET/CT; intraoperative extent of BONJ slightly larger than predicted with CEMR imaging and CBCT                      |
| 2           | BONJ suspected preoperatively in regions 44–46 of right mandible; actual extent of BONJ markedly larger than expected clinically and on CBCT; both CEMR imaging and PET/CT were more specific in determining the true extent of disease as confirmed intraoperatively                                                                              |
| 3           | BONJ identified in the left mandible in regions 34–37; extent of BONJ markedly larger than clinically expected and best assessed with PET/CT and CEMR imaging; in both, larger extent of disease than in CBCT and clinical pre- and intraoperative examinations                                                                                    |
| 4           | BONJ clinically suspected focally in region 34–36 and superficially in region 46 of the mandible; huge discrepancy between clinical examination with CBCT and other imaging modalities; in PET/CT even left ramus mandible increased tracer uptake but was not found suspicious in CEMR imaging; intraoperative examination consistent with PET/CT |
| 5           | BONJ only superficially in the regions 14–17 of right maxilla; true extent of disease slightly larger but equally well-detected with all imaging modalities and intraoperative examination                                                                                                                                                         |
| 6           | Discrepancy of BONJ extent between modalities small; CEMR imaging showed slightly larger extent of the disease into right ramus mandible (regions 45–47) than PET/CT and CBCT                                                                                                                                                                      |
| 7           | BONJ clinically suspected in right mandible at regions 45–47; CEMR imaging, PET/CT, and, to a lesser degree, CBCT showed markedly larger extent of disease than clinically expected and intraoperatively resected; on CEMR imaging, signal alterations of bone crossed midline, reaching left parasymphysal region of mandible                     |
| 8           | Only small focus of BONJ in regions 15–16 of right maxilla clinically suspected; imaging revealed larger extent affecting regions 11–17 in CEMR imaging and PET/CT; extent on CBCT markedly smaller                                                                                                                                                |
| 9           | Rather concordant findings of BONJ extent in regions 14–15 of right maxilla for all imaging modalities; most interesting, no focus of BONJ noted clinically but suspected and located to this region from patient symptoms and history                                                                                                             |
| 10          | Clinically suspicious BONJ in regions 17–18 of right maxilla and indeterminate focus in region 26 of left maxilla; only PET/CT confirmed first focus; due to general poor health no operation was performed                                                                                                                                        |
